# Supplementary material for: Homeostatic Presynaptic Plasticity Is Specifically Regulated by P/Q-type Ca2+ Channels at Mammalian Hippocampal Synapses
Source: PubMed Central journal article supplement (PMC5643522; doi:10.1016/j.celrep.2017.09.061), 2017-10-10
Supplement: mmc2.pdf [file mmc2.pdf]

## Homeostatic Presynaptic Plasticity Is Specifically Regulated by P/Q-type Ca<sup>2+</sup> Channels at Mammalian Hippocampal Synapses

### Graphical Abstract

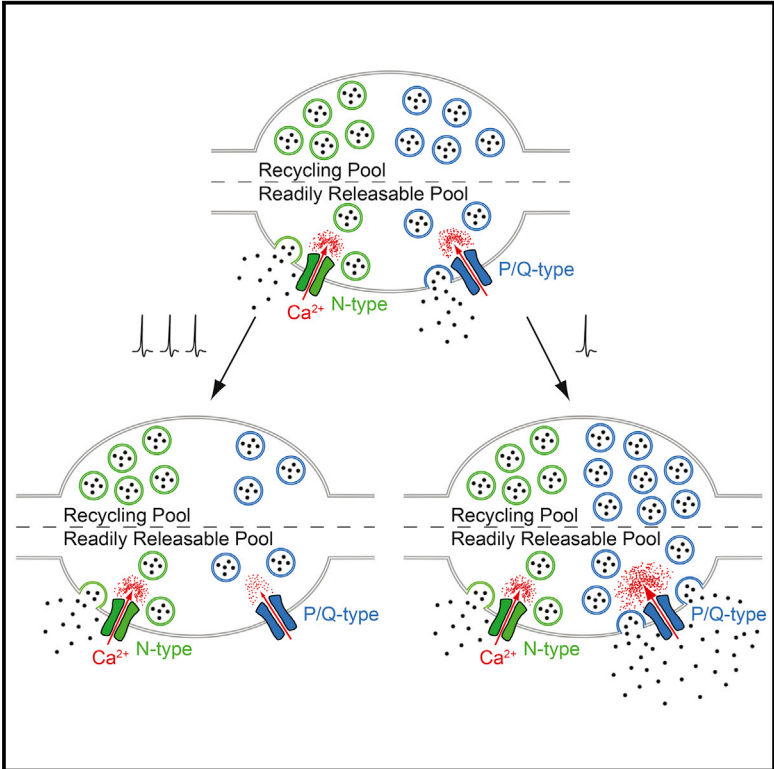

### Authors

Alexander F. Jeans, Fran C. van Heusden, Bashayer Al-Mubarak, Zahid Padamsey, Nigel J. Emptage

### Correspondence

alexander.jeans@pharm.ox.ac.uk (A.F.J.),  
nigel.emptage@pharm.ox.ac.uk (N.J.E.)

### In Brief

Jeans et al. show that both basal neurotransmission and synaptic vesicle pool sizes are specifically regulated by the presynaptic P/Q-type voltage-gated Ca<sup>2+</sup> channel during HSP at mammalian hippocampal synapses. This may shed light on mechanisms underlying phenotypes associated with P/Q-type channelopathies, including migraine and epilepsy.

### Highlights

- P/Q-type VGCC regulate homeostatic synaptic plasticity (HSP) in mammals
- Changes in synaptic vesicle pool sizes during HSP are also mediated via P/Q-type VGCC
- Expression of HSP is independent of N-type VGCC regulation
- P/Q-type regulation of HSP may explain phenotypes of P/Q-type channelopathies

# Homeostatic Presynaptic Plasticity Is Specifically Regulated by P/Q-type Ca<sup>2+</sup> Channels at Mammalian Hippocampal Synapses

Alexander F. Jeans,<sup>1,4,\*</sup> Fran C. van Heusden,<sup>1,3</sup> Bashayer Al-Mubarak,<sup>1,2,3</sup> Zahid Padamsey,<sup>1</sup> and Nigel J. Emptage<sup>1,\*</sup>

<sup>1</sup>Department of Pharmacology, University of Oxford, Mansfield Road, Oxford OX1 3QT, UK

<sup>2</sup>Department of Genetics, King Faisal Specialist Hospital and Research Center, PO Box 3354, Riyadh 11211, Saudi Arabia

<sup>3</sup>These authors contributed equally

<sup>4</sup>Lead Contact

\*Correspondence: alexander.jeans@pharm.ox.ac.uk (A.F.J.), nigel.emptage@pharm.ox.ac.uk (N.J.E.)

<https://doi.org/10.1016/j.celrep.2017.09.061>

## SUMMARY

Voltage-dependent Ca<sup>2+</sup> channels (VGCC) represent the principal source of Ca<sup>2+</sup> ions driving evoked neurotransmitter release at presynaptic boutons. In mammals, presynaptic Ca<sup>2+</sup> influx is mediated mainly via P/Q-type and N-type VGCC, which differ in their properties. Changes in their relative contributions tune neurotransmission both during development and in Hebbian plasticity. However, whether this represents a functional motif also present in other forms of activity-dependent regulation is unknown. Here, we study the role of VGCC in homeostatic plasticity (HSP) in mammalian hippocampal neurons using optical techniques. We find that changes in evoked Ca<sup>2+</sup> currents specifically through P/Q-type, but not N-type, VGCC mediate bidirectional homeostatic regulation of both neurotransmitter release efficacy and the size of the major synaptic vesicle pools. Selective dependence of HSP on P/Q-type VGCC in mammalian terminals has important implications for phenotypes associated with P/Q-type channelopathies, including migraine and epilepsy.

## INTRODUCTION

Voltage-gated Ca<sup>2+</sup> channels (VGCC) provide the essential link between membrane depolarization and synaptic vesicle exocytosis at presynaptic boutons and play a critical role in tuning neurotransmission (Catterall and Few, 2008). In the mammalian hippocampus, P/Q-type (Ca<sub>v</sub>2.1) and N-type (Ca<sub>v</sub>2.2) VGCC are the main presynaptic sources of Ca<sup>2+</sup> influx (Takahashi and Momiyama, 1993; Wheeler et al., 1994). The proportional contribution of P/Q- and N-type VGCC to neurotransmitter release varies among individual synapses (Ariel et al., 2013) and, given their differing functional properties (Catterall and Few, 2008), decisively shapes synaptic transmission both during development and in Hebbian plasticity (Ahmed and Siegelbaum, 2009; Fedchyshyn and Wang, 2005). However, whether the differential

control of neurotransmission by VGCC represents a general principle that extends to other forms of activity-dependent synaptic regulation is not known.

Homeostatic synaptic plasticity (HSP) represents a major form of synaptic plasticity that is essential for maintaining stability and efficient information processing in neuronal networks in the face of constantly changing levels of activity (Turrigiano, 2012). Both pre- and postsynaptic changes mediate HSP, although the contribution of each seems to be dependent on several factors including age: at younger cortical and hippocampal synapses, for instance, HSP is exclusively postsynaptic, but a presynaptic locus of expression emerges as circuits mature (Han and Stevens, 2009; Wierenga et al., 2005, 2006). Presynaptic HSP has been best studied at the *Drosophila* neuromuscular junction, where homeostatic adjustments in neurotransmitter release are mediated by a signaling system that converges on P/Q-type VGCC encoded by the locus *cacophony* (Davis and Müller, 2015). However, evoked neurotransmitter release in *Drosophila* is driven by *cacophony*-encoded VGCC alone (Littleton and Ganetzky, 2000), whereas the N-type VGCC seems to have arisen later in evolution as the result of a gene duplication event (Tyson and Snutch, 2013). The combinatorial regulation of release by presynaptic VGCC seen at mammalian synapses is not, therefore, a feature of this system. In mammals, N-type, but not P/Q-type, VGCC function is regulated by the enzyme CDK5 (Kim and Ryan, 2013; Su et al., 2012), a key effector of HSP both pre- and postsynaptically (Kim and Ryan, 2010; Seeburg et al., 2008). This has led to an assumption that N-type channels are likely to be the sole presynaptic VGCC mediating HSP at mammalian synapses (Frank, 2014; Kim and Ryan, 2013). However, the regulation of release by VGCC has never been directly investigated in the context of the chronic changes in network activity necessary to induce HSP (Turrigiano et al., 1998).

We set out to better understand how VGCC support HSP at mammalian synapses using high-resolution optical methods to probe both Ca<sup>2+</sup> influx and neurotransmitter release in dissociated hippocampal cultures. We find that changes in evoked Ca<sup>2+</sup> currents specifically through P/Q-type channels support bidirectional homeostatic changes in both the efficacy of neurotransmitter release and the size of the major synaptic vesicle pools. Our findings suggest that the differential regulation of transmitter release by VGCC subtypes may be a general

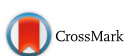

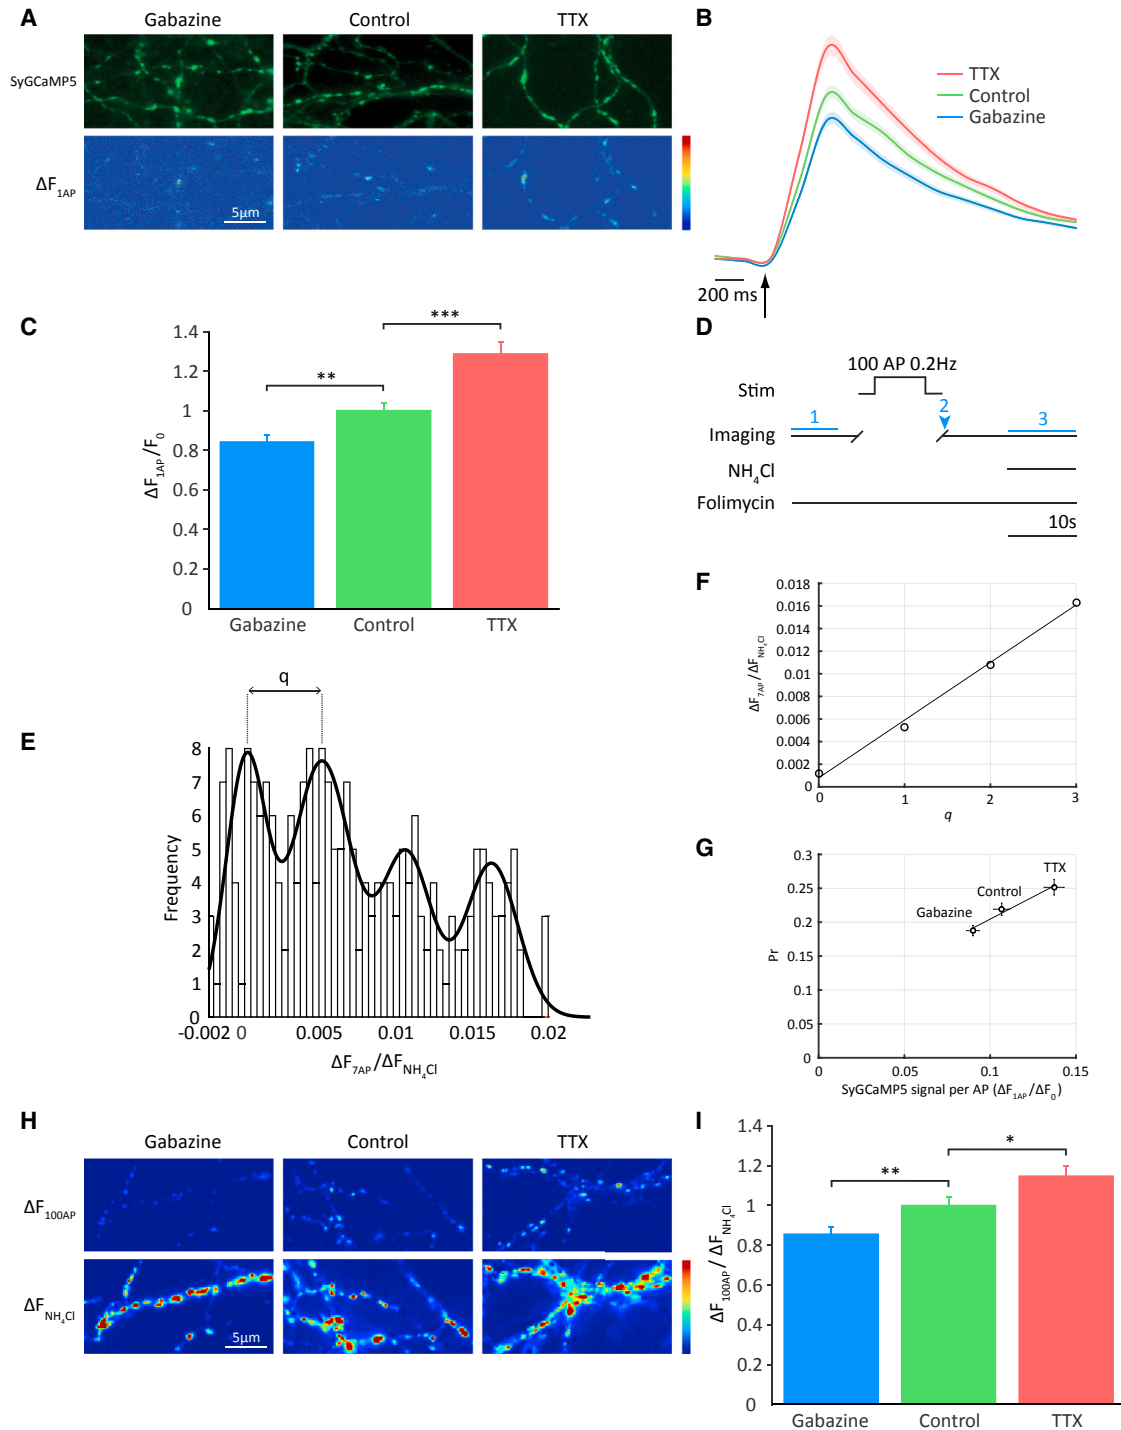

### Figure 1. Homeostatic Changes in Presynaptic Ca<sup>2+</sup> Influx and Neurotransmitter Release at Mammalian Synapses

(A) Sample images showing rat hippocampal neurons expressing the presynaptic Ca<sup>2+</sup> indicator SyGCaMP5 and subjected to chronic drug treatments as indicated. Difference images in the lower panels show responses of terminals to a single AP.

(B) Average SyGCaMP5 fluorescence traces obtained in response to the 1 AP stimulus. Arrow denotes delivery of stimulus.

(C) Mean peak amplitudes of normalized Ca<sup>2+</sup> responses: gabazine treatment:  $0.843 \pm 0.037$  (n = 584 synapses from 17 cells); vehicle-treated control,  $1 \pm 0.040$  (n = 695 synapses from 18 cells); TTX treatment,  $1.286 \pm 0.061$  (n = 479 synapses from 14 cells).

(D) Experimental scheme for determination of summated Syph 2x pFluorin responses to single AP stimuli: cells are imaged before (1) and after (2) a period of low-frequency stimulation (100 AP/0.2 Hz) in the presence of the V-ATPase inhibitor folimycin, which prevents synaptic vesicle re-acidification. The signal change is normalized to the maximally unquenched signal (3) to adjust for pFluorin expression level differences between cells.

(legend continued on next page)

principle by which presynaptic function is regulated in different activity-dependent contexts and have intriguing implications for the pathogenesis of key phenotypes associated with P/Q-type  $\text{Ca}^{2+}$  channelopathies, including migraine and epilepsy.

## RESULTS

### Homeostatic Changes in Presynaptic $\text{Ca}^{2+}$ Influx and Glutamate Release

To study the homeostatic effect of chronic changes in network activity on presynaptic calcium influx, we imaged cultured hippocampal neurons expressing SyGCaMP5, a genetically encoded  $\text{Ca}^{2+}$  reporter localized to synaptic vesicles (Akerboom et al., 2012). Neurons were pretreated for 24–36 hr with either the  $\text{Na}^+$  channel blocker TTX, to block spiking activity, or the GABA<sub>A</sub> receptor antagonist gabazine, to depress inhibitory tone, and the drugs were washed out before responses to single action potential (AP) stimuli were measured (Figure 1A). As expected, TTX-treated neurons showed a larger averaged single AP SyGCaMP5 response than did vehicle-treated control neurons, while the responses of gabazine-treated neurons were reduced (Figures 1B and 1C). We confirmed that our stimulation protocol reliably elicits single AP and that these drive presynaptic  $\text{Ca}^{2+}$  influx that generates a detectable SyGCaMP5 signal (Figure S1).

To explore homeostatic regulation of glutamate release, we took advantage of SypH 2x, a genetically encoded reporter of synaptic vesicle fusion (Zhu et al., 2009). Synaptic pHluorin probes have previously been used to detect responses to single AP stimulation, albeit with multiple trial averaging (Kim and Ryan, 2013; Zhao et al., 2011); however, we planned to use VGCC blocking peptides in many of our experiments, which drastically impair evoked release (Ariel et al., 2013). Indeed, preliminary data suggested that incubation with these peptides lowers averaged single AP responses below the threshold for detection in a substantial fraction of boutons (data not shown). Therefore, we needed to develop an approach to detect single AP release events under conditions of low release efficacy with enhanced sensitivity. To do this, we delivered 100 AP stimulation at very low frequency (0.2 Hz) in the presence of the vesicular ATPase inhibitor folimycin (Figure 1D), which blocks the reacidification of synaptic vesicles so that the pHluorin signal represents cumulative exocytosis (Sankaranarayanan and Ryan, 2001). This stimulation protocol induces repetitive release with little or no short-term plasticity (Tokuoka and Goda, 2008), allowing effective summation of single AP responses over 100 trials to give a greatly improved signal-to-noise ratio. To confirm that low fre-

quency stimulation yields quantal responses, we delivered a shorter, 7 AP train of stimuli at the same frequency in folimycin and plotted the distribution of the signal change, background-adjusted and normalized to the maximal value revealed by unquenching with  $\text{NH}_4\text{Cl}$ , across terminals (Tokuoka and Goda, 2008). The optimal Gaussian fit was obtained with 4 equally spaced distributions, confirming the quantal nature of the response (Figure 1E). The interpeak distance, which represents quantal size ( $q$ ), could then be calculated using linear regression (Figure 1F). To further validate our method, we used this estimate of  $q$  to calculate the probability of release ( $\text{Pr}$ ) of control terminals in culture. Taking the 100 AP SypH 2x response,  $\Delta F_{100\text{AP}}$ ,  $\text{Pr}$  was calculated as  $(\Delta F_{100\text{AP}}/100)/q$ . Average  $\text{Pr}$  in control cultures determined by this method ( $0.219 \pm 0.009$ ,  $n = 174$  synapses) was very similar to that previously reported (Tokuoka and Goda, 2008). Finally, we proved the sensitivity of our method by demonstrating its ability to detect unambiguously  $\text{Pr}$  changes in the region of 10% in response to the relatively subtle changes in presynaptic  $\text{Ca}^{2+}$  influx associated with homeostatic regulation (Figure 1G). Specifically, we found that, as for presynaptic  $\text{Ca}^{2+}$  influx, pretreatment with TTX enhanced glutamate release while it was reduced following gabazine treatment. These results show that chronic changes in network activity elicit parallel changes in both presynaptic  $\text{Ca}^{2+}$  influx and release, consistent with previous findings (Zhao et al., 2011).

### Mechanisms of Homeostatic Change in Presynaptic $\text{Ca}^{2+}$ Influx

We first asked whether changes in number or function of presynaptic VGCC underlie the homeostatic changes in  $\text{Ca}^{2+}$  influx. Optical fluctuation analysis uses calculations of the coefficient of variation (CV) of  $\text{Ca}^{2+}$  responses over individual trials to distinguish whether alterations in the magnitude of the  $\text{Ca}^{2+}$  response are due to changes in the number of VGCC present in presynaptic terminals ( $N$ ), their probability of opening in response to an AP ( $p$ ), or in intraboutonal free  $\text{Ca}^{2+}$  per channel opening ( $q$ ), which typically represents unitary channel conductance (Sabatini and Svoboda, 2000). Following either gabazine or TTX treatment, the  $\text{CV}^{-2}$  of  $\text{Ca}^{2+}$  responses was unchanged relative to untreated controls despite changes in mean response amplitude (Figures 2A and 2B), which is consistent with a modulation of  $q$  underlying bidirectional homeostatic changes in  $\text{Ca}^{2+}$  responses without change in  $N$  or  $p$ .

Neurotransmitter release at mammalian CNS synapses is driven by a combination of P/Q-type and N-type VGCC (Takahashi and Momiya, 1993; Wheeler et al., 1994). To determine the role played by each in mediating homeostatic changes in

(E) Release in response to a 0.2 Hz stimulus train is quantal. Following a 7 AP/0.2 Hz stimulus in the presence of folimycin, a frequency distribution of responses was plotted ( $n = 526$  synapses from 11 cells). The optimized Gaussian fit comprises 4 equally spaced distributions.

(F) Calculation of the interpeak distance using linear regression allows an estimate of quantal size ( $q$ ) as the slope of a plot of the mean of each Gaussian ( $q = 0.005 \Delta F/F_{\text{NH}_4\text{Cl}}$ ).  $\text{Pr}$  was then calculated from the 100 AP response in a sample of control neurons as  $0.219 \pm 0.009$  ( $n = 174$  synapses from 7 cells), in excellent agreement with previous reports.

(G) This method is sensitive enough to detect changes in basal  $\text{Pr}$  of  $<10\%$  in response to the relatively small changes in presynaptic  $\text{Ca}^{2+}$  influx accompanying homeostatic regulation (data derived from I).

(H) Sample images showing response of SypH 2x-expressing terminals treated as indicated to a low-frequency 100 AP train in the presence of folimycin.

(I) Mean normalized SypH 2x responses: gabazine treatment:  $0.856 \pm 0.0346$  ( $n = 180$  synapses from 7 cells); vehicle-treated control,  $1 \pm 0.042$  ( $n = 174$  synapses from 7 cells); TTX treatment,  $1.148 \pm 0.052$  ( $n = 214$  synapses from 5 cells). Shading or error bars represent  $\pm$  SEM. \* $p < 0.05$ , \*\* $p < 0.01$ , \*\*\* $p < 0.0001$ .

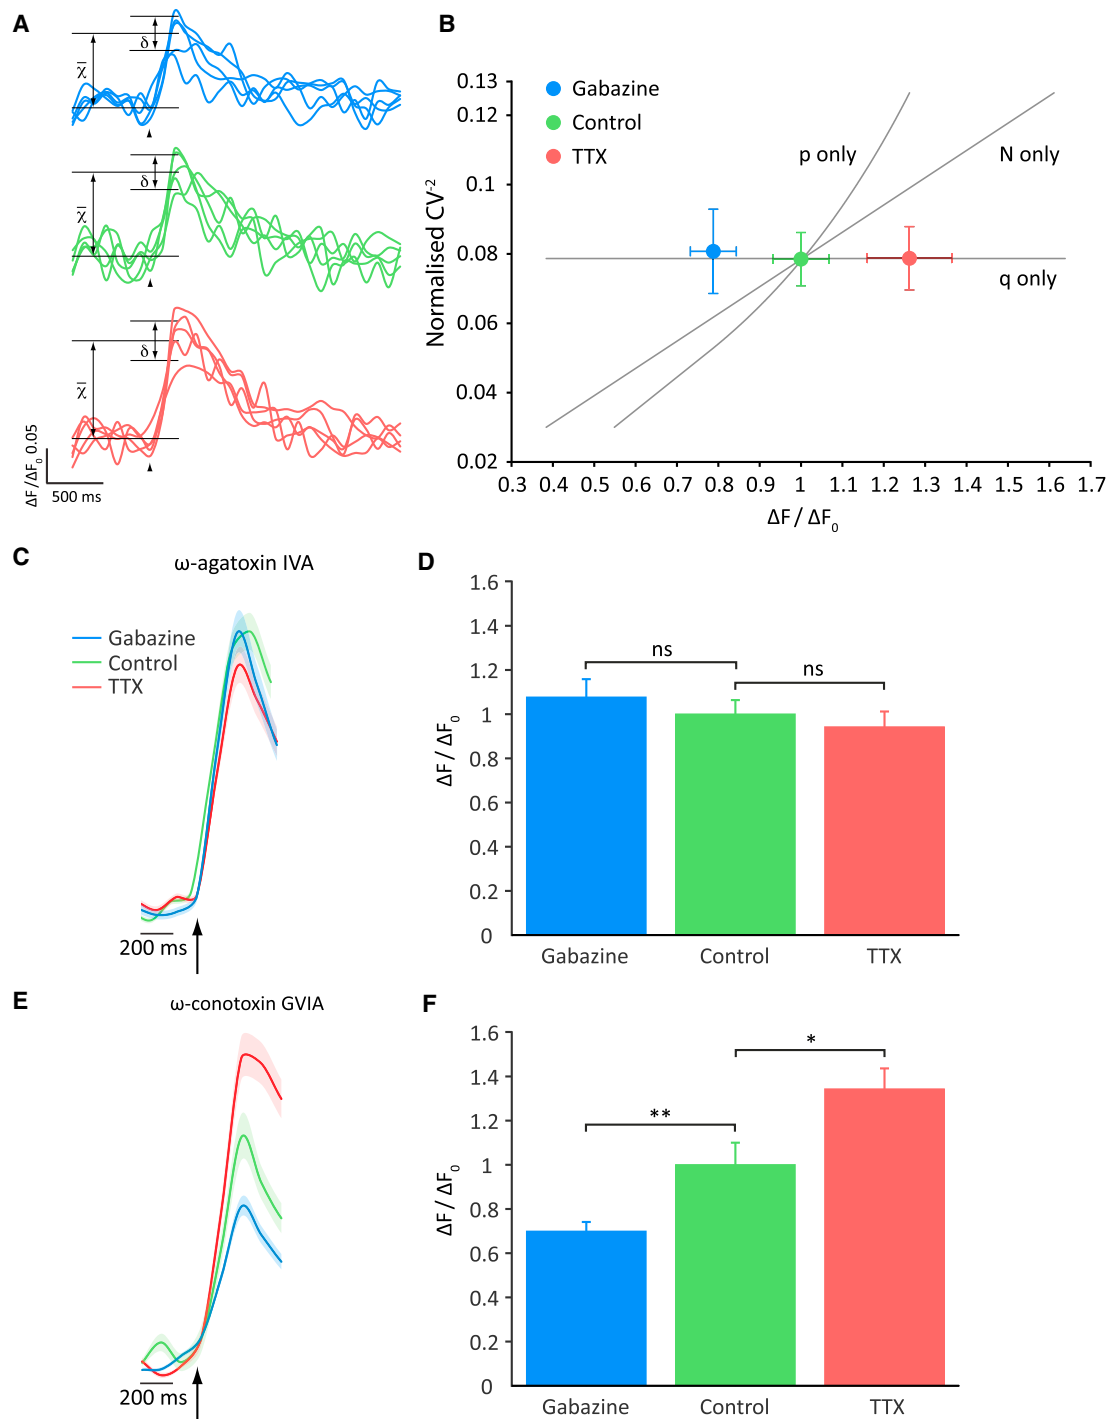

**Figure 2. P/Q-type VGCC Drive Homeostatic Changes in Presynaptic  $\text{Ca}^{2+}$  Influx**

(A) Optical fluctuation analysis of  $\text{Ca}^{2+}$  responses: fluctuation of responses in gabazine-treated, control, and TTX-treated cells using data from Figure 1C ( $\bar{x}$ , mean;  $\delta$ , SD of  $\Delta[\text{Ca}^{2+}]$ ; arrowheads indicate delivery of AP).

(B) Relationship between the mean of the inverse squared coefficient of variation ( $\text{CV}^{-2}$ ) and mean amplitude of response in each of the three treatment conditions. The lines are predictions of what would be observed if homeostatic changes in  $\text{Ca}^{2+}$  response amplitude were explained solely by changes in the number of VGCC (N), their open probability (p) or free  $\text{Ca}^{2+}$  concentration per channel opening (q). Data did not significantly deviate from what is predicted for changes in q ( $p = 0.59$ ), but showed very significant deviation from predictions for N or p change (both  $p < 0.01$ ).

(C) Average SyGCaMP5 fluorescence traces obtained in response to the 1AP stimulus in the presence of  $\omega$ -agatoxin IVA. Arrow represents delivery of AP.

(legend continued on next page)



presynaptic  $\text{Ca}^{2+}$  influx, SyGCaMP5-expressing neurons were treated for 24–36 hr with TTX, vehicle, or gabazine before the drugs were washed out and responses to single AP stimulation were monitored in the presence of highly specific peptide blockers of either P/Q-type ( $\omega$ -agatoxin IVA) or N-type ( $\omega$ -conotoxin GVIA) VGCC. Agatoxin completely abolished the effect of chronic manipulation of activity on presynaptic  $\text{Ca}^{2+}$  influx (Figures 2C and 2D), whereas the differences between the drug-treated groups were retained in the presence of conotoxin (Figures 2E and 2F). These data indicate that P/Q-type, but not N-type, VGCCs are required for presynaptic homeostatic effects. Overall, our results thus far suggest that modulation of P/Q-type VGCC unitary conductance underlies bidirectional homeostatic changes in presynaptic  $\text{Ca}^{2+}$  influx in response to chronic alterations in network activity.

### Mechanisms of Homeostatic Change in Synaptic Vesicle Exocytosis

As VGCC-mediated presynaptic  $\text{Ca}^{2+}$  influx is the major source of calcium for AP-dependent neurotransmitter release (Catterall and Few, 2008), we next sought to confirm whether the selective requirement of P/Q-type channels for homeostatic changes in presynaptic calcium influx is also true for neurotransmitter release. Chronically treated SypH 2x-expressing neurons were again imaged before and after delivery of a low frequency 100 AP stimulus in folimycin, this time with either agatoxin or conotoxin added. In agreement with our SyGCaMP5 data, we found that agatoxin application abolished homeostatic changes in release induced by the chronic drug treatments (Figures 3A and 3C), whereas the effects of homeostasis were fully apparent in conotoxin (Figures 3B and 3D).

Homeostatic changes in neurotransmitter release could involve changes in addition to altered presynaptic  $\text{Ca}^{2+}$  influx. Measurements of basal presynaptic strength can be parsed into two parameters: the number of synaptic vesicles available for release upon arrival of a single AP, known as the readily releasable pool (RRP), and the probability that a vesicle in the RRP will undergo AP-evoked fusion (Schneggenburger et al., 2002), the latter a function of both presynaptic  $\text{Ca}^{2+}$  influx and the physical coupling of VGCC to release sites (Catterall and Few, 2008). To assess VGCC-release site coupling in HSP, we examined the effects of pre-incubation with the slow  $\text{Ca}^{2+}$  buffer EGTA-AM (200  $\mu\text{M}$  for 60 s) on release in neurons in which P/Q-type VGCC had been isolated by the addition of  $\omega$ -conotoxin GVIA (Müller and Davis, 2012). We found that induction of HSP had no effect on the EGTA sensitivity of release, indicating that coupling is unchanged (Figure S2). To probe possible changes in the size of the RRP during HSP, we stimulated neurons expressing SypH 2x with 40 AP at 20 Hz, a protocol widely used to fully deplete the RRP (Rosenmund and Stevens, 1996). Both gabazine and TTX-treated neurons showed significant differ-

ences to controls (Figures 4A and 4B), suggesting bidirectional regulation of RRP size in homeostasis.

Given our previous findings, we wondered whether changes in RRP size might be mediated via a specific VGCC subtype. We wished, in addition, to extend our studies to include the total recycling pool (TRP), the entire pool of vesicles that can be released during synaptic activity. The TRP plays a critical role in determining the efficacy of synaptic function during prolonged stimulation and has been shown to be enhanced by chronic silencing of network activity (Kim and Ryan, 2010). Two successive stimulus trains, an initial 40 AP at 20 Hz followed by 600 AP at 10 Hz, were delivered to chronically treated SypH 2x-expressing neurons in the presence of folimycin in order to deplete the RRP and TRP, respectively (Fernandez-Alfonso and Ryan, 2008). We found that, as for the RRP, the overall size of the TRP is bidirectionally regulated by HSP (Figures 4C and 4D). When we then carried out the same experiments in either agatoxin or conotoxin to isolate N- or P/Q-type VGCC, we found that plateau signals following both stimulus trains were superimposed under all conditions in agatoxin (Figures 4E–4G), but in conotoxin showed very clear bidirectional regulation by HSP in a manner that reflected changes in overall RRP and TRP size (Figures 4H–4J). For both RRP and TRP under all conditions, the sum of the pool accessible through N- or P/Q-type VGCC alone was approximately equal to the total size of the pool measured without VGCC blockade. Together, these results show that HSP elicits changes in both basal release efficacy and the size of the major functional synaptic vesicle pools that are mediated specifically through P/Q-type, and not N-type, VGCC.

### DISCUSSION

We have used an optical approach to examine the role of VGCC in synaptic homeostasis at mammalian terminals, finding that homeostatic changes in evoked presynaptic  $\text{Ca}^{2+}$  currents, basal neurotransmitter release efficacy, and the size of the major functional synaptic vesicle pools are mediated specifically via P/Q-type VGCC.

Using optical fluctuation analysis, we showed that homeostatic effects on presynaptic AP-evoked  $\text{Ca}^{2+}$  influx were due to changes in intraboutonal free  $\text{Ca}^{2+}$  per channel opening, rather than in VGCC number or opening probability. While intraboutonal free  $\text{Ca}^{2+}$  represents an integrated measure of channel conductance, opening duration, and intraboutonal  $\text{Ca}^{2+}$  buffering capacity (Sabatini and Svoboda, 2000), involvement of the latter would be at odds with the VGCC subtype-specific nature of homeostatic effects; presynaptic homeostasis is therefore likely to be induced via direct modulation of P/Q-type currents. Several regulatory mechanisms have been reported for P/Q-type VGCC including association with SNAREs, G protein

(D) Mean peak amplitudes of normalized responses in  $\omega$ -agatoxin IVA: gabazine treatment,  $1.077 \pm 0.082$  ( $n = 233$  synapses from 6 cells); vehicle-treated control,  $1 \pm 0.064$  ( $n = 269$  synapses from 8 cells); TTX treatment,  $0.942 \pm 0.042$  ( $n = 206$  synapses from 8 cells).

(E) Average SyGCaMP5 fluorescence traces obtained in response to the 1 AP stimulus in the presence of  $\omega$ -conotoxin GVIA. Arrow represents delivery of AP.

(F) Mean peak amplitudes of normalized responses in  $\omega$ -conotoxin GVIA: gabazine treatment:  $0.699 \pm 0.042$  ( $n = 414$  synapses from 16 cells); vehicle-treated control,  $1 \pm 0.10$  ( $n = 310$  synapses from 10 cells); TTX treatment,  $1.343 \pm 0.094$  ( $n = 295$  synapses from 13 cells). Shading or error bars represent  $\pm$  SEM. \* $p < 0.05$ , \*\* $p < 0.01$ ; ns, non-significant.

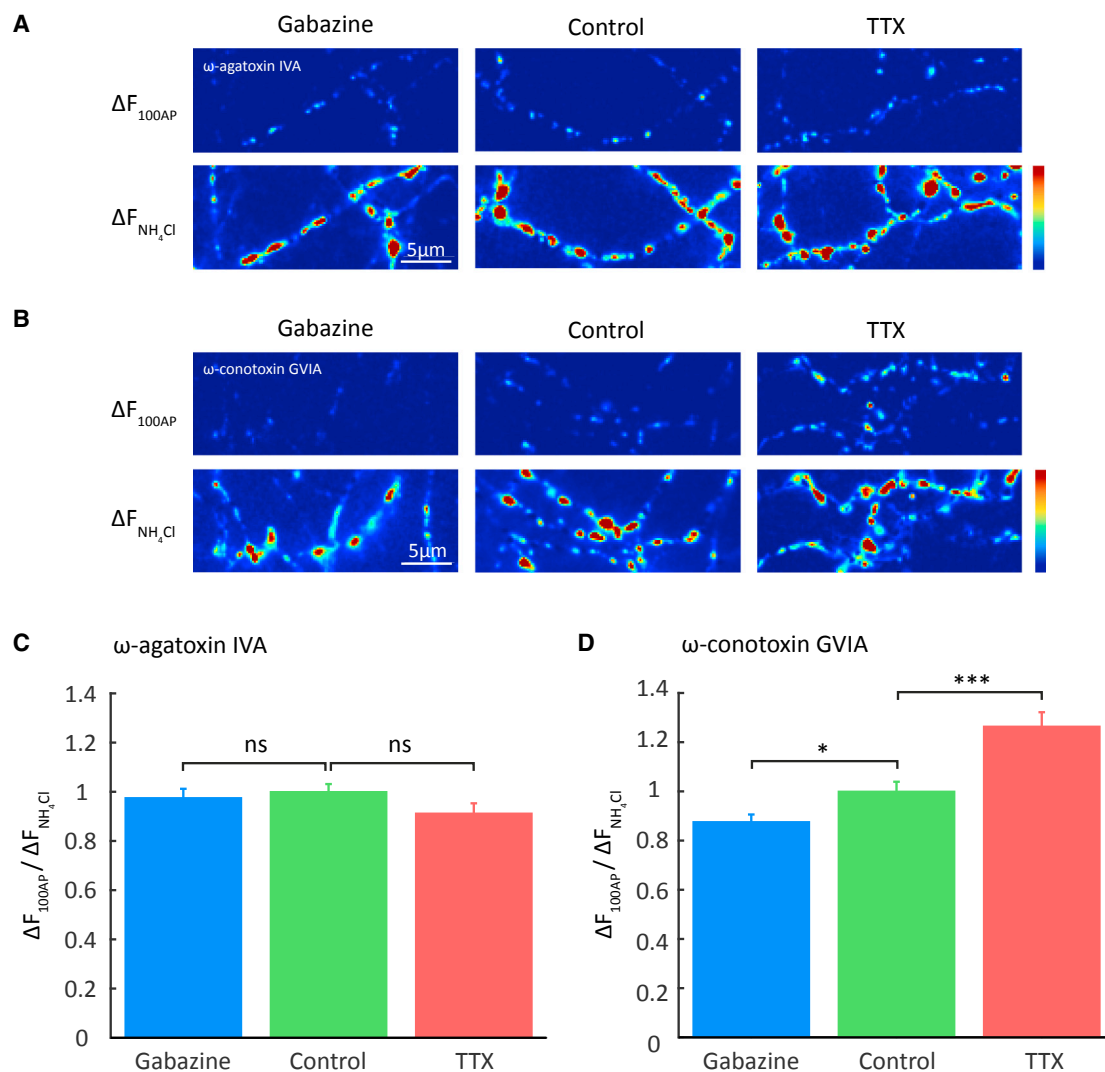

**Figure 3. Homeostatic Changes in Neurotransmitter Release Are Driven by P/Q-type VGCC**

(A and B) Sample images showing response of SypH 2x-expressing terminals treated as indicated to a low-frequency 100 AP train in the presence of folimycin and either  $\omega$ -agatoxin IVA (A) or  $\omega$ -conotoxin GVIA (B).

(C) Mean normalized responses in  $\omega$ -agatoxin IVA: gabazine treatment,  $0.975 \pm 0.037$  ( $n = 333$  synapses from 15 cells); vehicle-treated control,  $1 \pm 0.031$  ( $n = 416$  synapses from 19 cells); TTX treatment,  $0.912 \pm 0.041$  ( $n = 354$  synapses from 17 cells).

(D) Mean normalized responses in  $\omega$ -conotoxin GVIA: gabazine treatment:  $0.876 \pm 0.045$  ( $n = 377$  synapses from 11 cells); vehicle-treated control,  $1 \pm 0.039$  ( $n = 375$  synapses from 14 cells); TTX treatment,  $1.264 \pm 0.057$  ( $n = 282$  synapses from 12 cells). Shading or error bars represent  $\pm$  SEM. \* $p < 0.05$ , \*\*\* $p < 0.001$ ; ns, non-significant.

interactions, and channel binding by calmodulin (Catterall and Few, 2008), although these mechanisms predominantly regulate opening probability rather than channel currents. A more plausible suggestion comes from a recent study showing a role for alternative splicing of P/Q-type VGCC transcripts in various forms of presynaptic plasticity (Thalhammer et al., 2017), because alternative splicing specifically regulates unitary channel conductance (Chaudhuri et al., 2004).

We also examined presynaptic HSP at the level of neurotransmitter release, again finding a selective dependence on P/Q-type VGCC. We went on to probe whether mechanisms other than altered  $Ca^{2+}$  currents might contribute to presynaptic homeo-

static plasticity. While we found no differences in the physical coupling of VGCC to release sites, an important determinant of presynaptic strength that has been suggested as a possible mechanism of presynaptic homeostasis (Müller et al., 2011), we did find that homeostasis was associated with modulation of the size of the RRP. This is consistent with most studies of homeostatic plasticity at both mammalian central synapses (Moulder et al., 2006; Müller et al., 2012; Murthy et al., 2001) and peripheral synapses (Davis and Müller, 2015), although some report no change (Zhao et al., 2011), suggesting that recruitment of RRP regulatory mechanisms may depend on synaptic maturity or homeostasis induction protocol, both of which

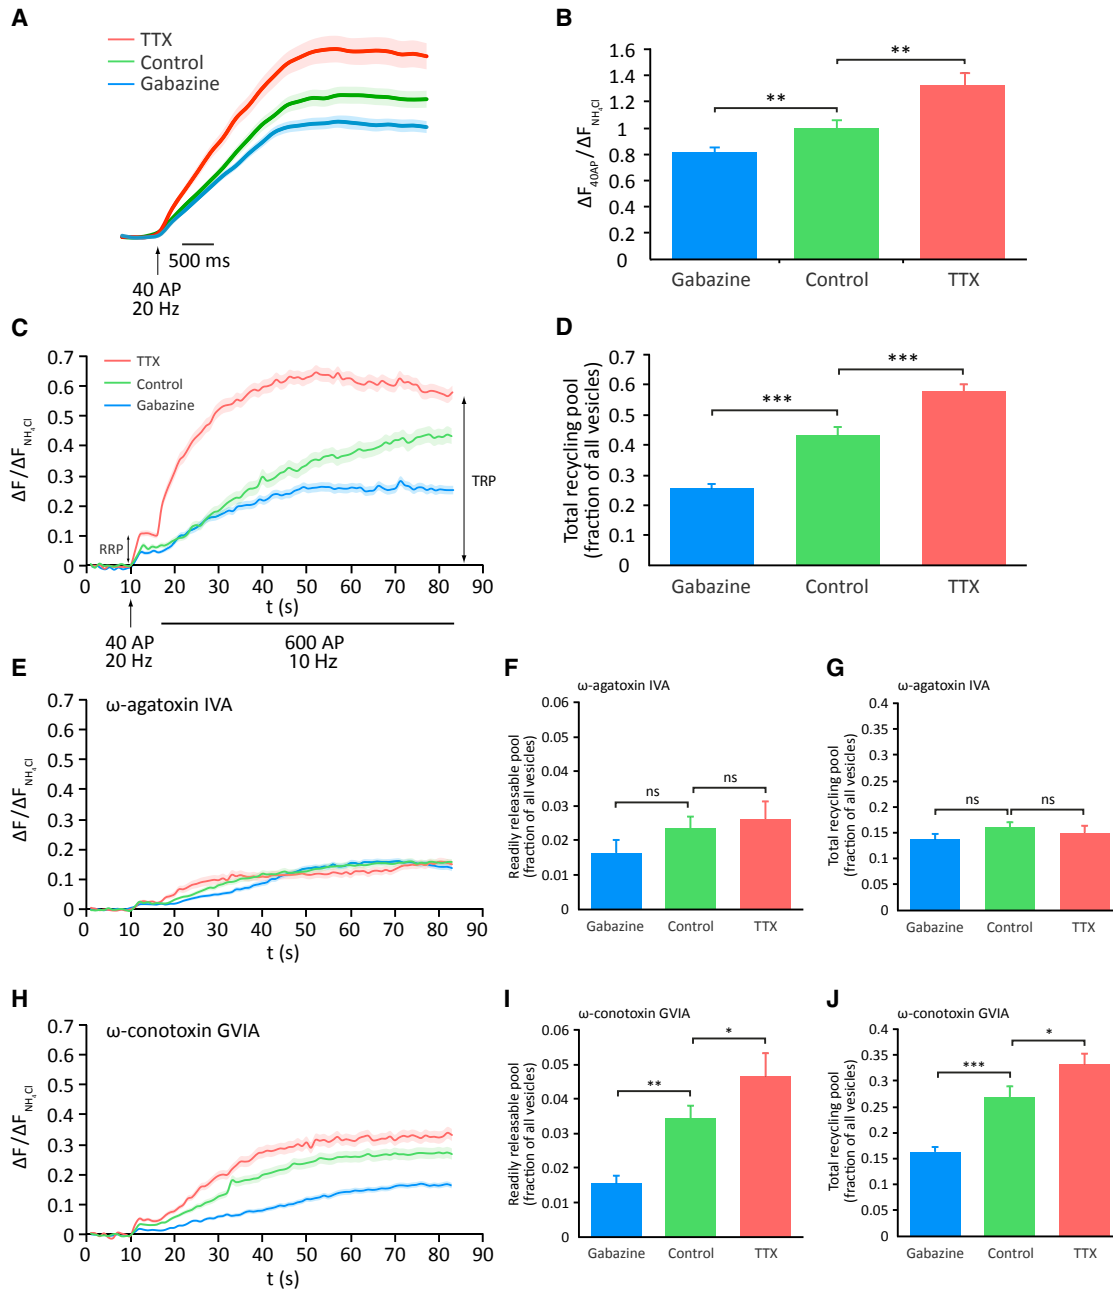

**Figure 4. HSP Elicits Bidirectional Changes in Readily Releasable and Total Recycling Pool Size Driven by P/Q-type VGCC**

(A) Average SyH 2x traces showing responses to 40 AP at 20 Hz, a stimulus that depletes the readily releasable pool (RRP) of synaptic vesicles.  
 (B) Mean peak amplitudes of 40 AP responses: gabazine treatment,  $0.814 \pm 0.0429$  (n = 327 synapses from 10 neurons); control,  $1 \pm 0.0590$  (n = 208 synapses from 7 neurons); TTX treatment,  $1.326 \pm 0.0940$  (n = 250 synapses from 10 neurons).  
 (C) Average SyH 2x responses to a stimulation protocol comprising an initial 40 AP at 20 Hz, to release the RRP, followed by 600 AP at 10 Hz to release the remainder of the total recycling pool (TRP) under control conditions and following induction of HSP with chronic drug treatments as indicated. Experiments include folimycin, therefore the fluorescence signal represents a cumulative response.  
 (D) Mean peak amplitudes of final plateau responses, representing TRP: gabazine treatment,  $0.256 \pm 0.014$  (n = 82 synapses from 3 cells); vehicle-treated control,  $0.432 \pm 0.026$  (n = 97 synapses from 3 cells); TTX treatment,  $0.579 \pm 0.022$  (n = 93 synapses from 3 cells).  
 (E) Average SyH 2x traces for experiments performed as (C) with the addition of  $\omega$ -agatoxin IVA to isolate N-type VGCC.  
 (F) Mean peak amplitude of the initial 40 AP response in agatoxin, representing the RRP: gabazine treatment,  $0.0164 \pm 0.0036$  (n = 63 synapses from 3 cells); vehicle-treated control,  $0.0236 \pm 0.0032$  (n = 123 synapses from 3 cells); TTX treatment,  $0.0262 \pm 0.0050$  (n = 93 synapses from 3 cells).  
 (G) Final plateau response in agatoxin, representing the TRP: gabazine treatment,  $0.137 \pm 0.010$  (n = 63 synapses from 3 cells); vehicle-treated control,  $0.161 \pm 0.0097$  (n = 123 synapses from 3 cells); TTX treatment,  $0.150 \pm 0.014$  (n = 93 synapses from 3 cells).

(legend continued on next page)



differ among these various studies. An alternative explanation may be that effective RRP size, defined as those release-ready vesicles that can be released by AP stimulation, is controlled by presynaptic  $\text{Ca}^{2+}$  influx (Thanawala and Regehr, 2013). This might also explain why homeostatic changes in RRP size do not influence release in the presence of  $\omega$ -agatoxin IVA in our experiments (Figure 3C), because  $\text{Ca}^{2+}$  influx through N-type VGCC is unchanged.

We asked whether changes in the size of both the RRP and the total recycling pool (TRP), which has been shown to increase in size following chronic silencing of network activity (Kim and Ryan, 2010), might also be mediated via a specific VGCC subtype. First, we established that the TRP is bidirectionally regulated during HSP, which confirms and extends the findings of Kim and Ryan (2010). We then showed that homeostatic changes in the size of both the RRP and TRP are mediated specifically via P/Q-type VGCC. In these experiments, it was also evident that  $\text{Ca}^{2+}$  influx through either channel type was able to release only a fraction of the TRP after which further stimulation was unable to release the remaining TRP vesicles, corresponding to a plateau of the SypH 2x signal. This interesting set of observations suggests that synaptic vesicles may be somehow committed to one VGCC subtype and cannot be released by  $\text{Ca}^{2+}$  entering through other VGCC subtypes. This might partly reflect the existence of active zone  $\text{Ca}^{2+}$  microdomains even during prolonged stimulation, such that the  $\text{Ca}^{2+}$  concentration required to drive vesicular membrane fusion is only reached in the immediate vicinity of VGCC (Parekh, 2008); vesicles docked to VGCC under blockade would therefore not be released. However, because the RRP of docked, release-competent vesicles is a relatively small fraction of the overall TRP (Rey et al., 2015), this would not explain the large discrepancy between TRP size with and without a VGCC blocker. Therefore, it is likely that the recruitment of new releasable vesicles to the active zone during a stimulus train is also channel-specific. It might be that the presynaptic vesicle trafficking machinery actively directs reserve vesicles toward  $\text{Ca}^{2+}$  microdomains associated with one or the other VGCC subtype; alternatively, synaptic vesicles themselves may have a VGCC-specific identity, which would add an intriguing dimension to the emerging theme of vesicle pool-specific molecular identities (Crawford and Kavalali, 2015).

All of the mechanistic changes we identified supporting HSP did so bidirectionally in response to either elevated or depressed network activity. However, a recent study at the *Drosophila* identifies several single gene mutations that block homeostatic presynaptic potentiation while leaving depression intact, suggesting that in this system at least these two responses show a degree of mechanistic independence (Gaviño et al., 2015). Despite this, they seem to converge on key elements such as *cacophony*-encoded VGCC (Gaviño et al., 2015), and while there may also be

differences between mechanisms of homeostatic potentiation and depression at mammalian synapses, our data show that the involvement of P/Q-type VGCC is likewise conserved among both responses.

Our findings, together with work at the *Drosophila* NMJ (Davis and Müller, 2015), show that P/Q-type VGCC play an evolutionarily conserved role in mediating HSP at both invertebrate and mammalian synapses. P/Q-type VGCC are the sole driver of evoked release at invertebrate synapses, but at mammalian synapses this function is shared with N-type VGCC, which had previously been thought most likely to regulate presynaptic HSP (Frank, 2014; Kim and Ryan, 2013). It may therefore seem surprising that our data show that chronic modulation of basal release efficacy in mammals remains the sole responsibility of P/Q-type channels, however, it would be in keeping with the available functional data.  $\text{Ca}^{2+}$  influx through P/Q-type VGCC is more tightly coupled to release sites than that through N-type channels (Fedchyshyn and Wang, 2005; Ladera et al., 2009), and only P/Q-type channels support activity-dependent facilitation of  $\text{Ca}^{2+}$  currents (Inchauspe et al., 2004). Both of these observations suggest that P/Q-type VGCC might be better suited to mediating fast information transfer with high fidelity. N-type VGCC are, however, required for presynaptic Hebbian plasticity at some excitatory hippocampal synapses (Ahmed and Siegelbaum, 2009), while Hebbian plasticity specifically at the Schaffer collateral synapse seems to involve changes in RRP size rather than in presynaptic  $\text{Ca}^{2+}$  influx (Stanton et al., 2005; Wu and Saggau, 1994), underlining the multidimensional nature of presynaptic regulation. Together with our data, these observations suggest that the mechanisms of presynaptic Hebbian plasticity may be orthogonal to those of HSP, which could allow for effective homeostatic regulation of basal neurotransmission across synapses while preserving the relative differences in synaptic strength brought about by Hebbian changes.

Mutations in the pore-forming unit of the P/Q-type VGCC (CACNA1A) in humans give rise to the channelopathies familial hemiplegic migraine type 1 (FHM1) and episodic ataxia type 2 (EA2) (Cain and Snutch, 2011). The key phenotypes associated with these disorders, migraine, episodic ataxia, and epilepsy, are defined by long periods of neuronal stability punctuated by acute, relatively brief periods of dysfunction. It has been speculated that this reflects a disorder in HSP, because the process functions to prevent such departures from stable circuit function (Frank, 2014; Wondolowski and Dickman, 2013). Our work offers experimental support for this suggestion, because we show that effective regulation of P/Q-mediated  $\text{Ca}^{2+}$  currents, significantly impaired in mutated channels (Pietrobon, 2010), is essential for HSP. These findings therefore provide a firm basis for future work on the mechanistic basis of P/Q-type  $\text{Ca}^{2+}$  channelopathies and could also provide important insights into the pathogenesis of more common forms of migraine and epilepsy.

(H) Average SypH 2x traces for experiments as (C) with the addition of  $\omega$ -conotoxin GVIA to isolate P/Q-type VGCC.

(I) Mean peak amplitude of the initial 40 AP response in conotoxin, representing the RRP: gabazine treatment,  $0.0153 \pm 0.0024$  ( $n = 78$  synapses from 3 cells); vehicle-treated control,  $0.0344 \pm 0.0037$  ( $n = 121$  synapses from 3 cells); TTX treatment,  $0.0464 \pm 0.0068$  ( $n = 86$  synapses from 3 cells).

(J) Final plateau response in conotoxin, representing the TRP: gabazine treatment,  $0.163 \pm 0.0093$  ( $n = 78$  synapses from 3 cells); vehicle-treated control,  $0.270 \pm 0.019$  ( $n = 121$  synapses from 3 cells); TTX treatment,  $0.332 \pm 0.020$  ( $n = 86$  synapses from 3 cells). Shading or error bars represent  $\pm$  SEM. \* $p < 0.05$ , \*\* $p < 0.01$ , \*\*\* $p < 0.001$ ; ns, non-significant.

## EXPERIMENTAL PROCEDURES

### Live Cell Imaging

All animal work was carried out in accordance with the Animals (Scientific Procedures) Act, 1986 (UK) and under project and personal licenses approved by the Home Office (UK). Experiments were performed on dissociated hippocampal cultures at days in vitro (DIV) 14–18 when synapses are mature. Before imaging, coverslips were washed in Tyrode's buffer for 20 min to remove drug treatments. Experiments were carried out at room temperature in Tyrode's buffer with 10  $\mu$ M NBQX and 50  $\mu$ M APV added to block recurrent activity.  $\text{NH}_4\text{Cl}$  applications were done with 50 mM  $\text{NH}_4\text{Cl}$  in substitution of 50 mM of NaCl. For SynPH 2x experiments, folimycin (10 nM) was diluted into the medium. For experiments in which VGCCs were blocked, cultured hippocampal neurons were incubated with the P/Q-type channel blocker  $\omega$ -agatoxin IVA (400 nM) or  $\omega$ -conotoxin GVIA (400 nM) for at least 3 min prior to imaging. For more detail see the [Supplemental Experimental Procedures](#).

### Image Analysis

All visible, stable varicosities within the image field were selected for analysis using a 2  $\mu$ m diameter region of interest (ROI) and analyzed in ImageJ (<https://imagej.nih.gov/ij>) using the Time Series Analyzer plugin (<https://imagej.nih.gov/ij/plugins/time-series.html>). Data exported from ImageJ were background adjusted and, for pFluorins, normalized to the peak signal obtained following  $\text{NH}_4\text{Cl}$  application (mean value of plateau over 5 s). Terminals were excluded from analysis if their peak response to stimulation was  $<2$  ( $\text{Ca}^{2+}$  experiments and pFluorin experiments assessing vesicle pool sizes) or 4 (low frequency stimulation pFluorin protocol) SDs of baseline noise. Peak fluorescence in all experiments was taken at the end of the stimulation period. In experiments with SyGCaMP5,  $\text{Ca}^{2+}$  responses were averaged over 5 trials for each bouton. Analysis was performed in Microsoft Excel using custom-written macros.

### Statistical Analysis

Unless otherwise stated, the two-tailed unpaired Student's *t* test was used to determine the statistical significance of observed differences between various conditions. *p* values  $>0.05$  were regarded as non-significant. For more detail see the [Supplemental Experimental Procedures](#).

## SUPPLEMENTAL INFORMATION

Supplemental Information includes Supplemental Experimental Procedures and two figures and can be found with this article online at <https://doi.org/10.1016/j.celrep.2017.09.061>.

## AUTHOR CONTRIBUTIONS

A.F.J. designed the experiments, performed experiments, analyzed data, and wrote the manuscript. F.C.v.H., B.A.-M., and Z.P. performed experiments and analyzed data. N.J.E. wrote the manuscript.

## ACKNOWLEDGMENTS

We thank Leon Lagnado and Yongling Zhu for kind gifts of plasmids. F.C.v.H. was supported by an Erasmus+ and a NENS exchange grant. A.F.J. was supported by a Clinician Scientist Fellowship (G0802812) and a Centenary Award from the UK Medical Research Council. King Abdulaziz City for Science and Technology provided a Summer grant for B.A.-M. to carry out part of this study.

Received: January 17, 2017

Revised: August 11, 2017

Accepted: September 19, 2017

Published: October 10, 2017

## REFERENCES

Ahmed, M.S., and Siegelbaum, S.A. (2009). Recruitment of N-type  $\text{Ca}^{2+}$  channels during LTP enhances low release efficacy of hippocampal CA1 perforant path synapses. *Neuron* 63, 372–385.

Akerboom, J., Chen, T.W., Wardill, T.J., Tian, L., Marvin, J.S., Mutlu, S., Calderón, N.C., Esposti, F., Borghuis, B.G., Sun, X.R., et al. (2012). Optimization of a GCaMP calcium indicator for neural activity imaging. *J. Neurosci.* 32, 13819–13840.

Ariel, P., Hoppa, M.B., and Ryan, T.A. (2013). Intrinsic variability in Pv, RRP size,  $\text{Ca}^{2+}$  channel repertoire, and presynaptic potentiation in individual synaptic boutons. *Front. Synaptic Neurosci.* 4, 9.

Cain, S.M., and Snutch, T.P. (2011). Voltage-gated calcium channels and disease. *Biofactors* 37, 197–205.

Catterall, W.A., and Few, A.P. (2008). Calcium channel regulation and presynaptic plasticity. *Neuron* 59, 882–901.

Chaudhuri, D., Chang, S.Y., DeMaria, C.D., Alvania, R.S., Soong, T.W., and Yue, D.T. (2004). Alternative splicing as a molecular switch for  $\text{Ca}^{2+}$ /calmodulin-dependent facilitation of P/Q-type  $\text{Ca}^{2+}$  channels. *J. Neurosci.* 24, 6334–6342.

Crawford, D.C., and Kavalali, E.T. (2015). Molecular underpinnings of synaptic vesicle pool heterogeneity. *Traffic* 16, 338–364.

Davis, G.W., and Müller, M. (2015). Homeostatic control of presynaptic neurotransmitter release. *Annu. Rev. Physiol.* 77, 251–270.

Fedchyshyn, M.J., and Wang, L.Y. (2005). Developmental transformation of the release modality at the calyx of Held synapse. *J. Neurosci.* 25, 4131–4140.

Fernandez-Alfonso, T., and Ryan, T.A. (2008). A heterogeneous “resting” pool of synaptic vesicles that is dynamically interchanged across boutons in mammalian CNS synapses. *Brain Cell Biol.* 36, 87–100.

Frank, C.A. (2014). How voltage-gated calcium channels gate forms of homeostatic synaptic plasticity. *Front. Cell. Neurosci.* 8, 40.

Gaviño, M.A., Ford, K.J., Archila, S., and Davis, G.W. (2015). Homeostatic synaptic depression is achieved through a regulated decrease in presynaptic calcium channel abundance. *eLife* 4. <https://doi.org/10.7554/eLife.05473>.

Han, E.B., and Stevens, C.F. (2009). Development regulates a switch between post- and presynaptic strengthening in response to activity deprivation. *Proc. Natl. Acad. Sci. USA* 106, 10817–10822.

Inchauspe, C.G., Martini, F.J., Forsythe, I.D., and Uchitel, O.D. (2004). Functional compensation of P/Q by N-type channels blocks short-term plasticity at the calyx of Held presynaptic terminal. *J. Neurosci.* 24, 10379–10383.

Kim, S.H., and Ryan, T.A. (2010). CDK5 serves as a major control point in neurotransmitter release. *Neuron* 67, 797–809.

Kim, S.H., and Ryan, T.A. (2013). Balance of calcineurin  $A_z$  and CDK5 activities sets release probability at nerve terminals. *J. Neurosci.* 33, 8937–8950.

Ladera, C., Martín, R., Bartolomé-Martín, D., Torres, M., and Sánchez-Prieto, J. (2009). Partial compensation for N-type  $\text{Ca}^{2+}$  channel loss by P/Q-type  $\text{Ca}^{2+}$  channels underlines the differential release properties supported by these channels at cerebrocortical nerve terminals. *Eur. J. Neurosci.* 29, 1131–1140.

Littleton, J.T., and Ganetzky, B. (2000). Ion channels and synaptic organization: analysis of the *Drosophila* genome. *Neuron* 26, 35–43.

Moulder, K.L., Jiang, X., Taylor, A.A., Olney, J.W., and Mennerick, S. (2006). Physiological activity depresses synaptic function through an effect on vesicle priming. *J. Neurosci.* 26, 6618–6626.

Müller, M., and Davis, G.W. (2012). Transsynaptic control of presynaptic  $\text{Ca}^{2+}$  influx achieves homeostatic potentiation of neurotransmitter release. *Curr. Biol.* 22, 1102–1108.

Müller, M., Pym, E.C., Tong, A., and Davis, G.W. (2011). Rab3-GAP controls the progression of synaptic homeostasis at a late stage of vesicle release. *Neuron* 69, 749–762.

Müller, M., Liu, K.S.Y., Sigrist, S.J., and Davis, G.W. (2012). RIM controls homeostatic plasticity through modulation of the readily-releasable vesicle pool. *J. Neurosci.* 32, 16574–16585.

Murthy, V.N., Schikorski, T., Stevens, C.F., and Zhu, Y. (2001). Inactivity produces increases in neurotransmitter release and synapse size. *Neuron* 32, 673–682.

- Parekh, A.B. (2008). Ca<sup>2+</sup> microdomains near plasma membrane Ca<sup>2+</sup> channels: impact on cell function. *J. Physiol.* *586*, 3043–3054.
- Pietrobon, D. (2010). CaV2.1 channelopathies. *Pflugers Arch.* *460*, 375–393.
- Rey, S.A., Smith, C.A., Fowler, M.W., Crawford, F., Burden, J.J., and Staras, K. (2015). Ultrastructural and functional fate of recycled vesicles in hippocampal synapses. *Nat. Commun.* *6*, 8043.
- Rosenmund, C., and Stevens, C.F. (1996). Definition of the readily releasable pool of vesicles at hippocampal synapses. *Neuron* *16*, 1197–1207.
- Sabatini, B.L., and Svoboda, K. (2000). Analysis of calcium channels in single spines using optical fluctuation analysis. *Nature* *408*, 589–593.
- Sankaranarayanan, S., and Ryan, T.A. (2001). Calcium accelerates endocytosis of vSNAREs at hippocampal synapses. *Nat. Neurosci.* *4*, 129–136.
- Schneggenburger, R., Sakaba, T., and Neher, E. (2002). Vesicle pools and short-term synaptic depression: lessons from a large synapse. *Trends Neurosci.* *25*, 206–212.
- Seeburg, D.P., Feliu-Mojer, M., Gaiottino, J., Pak, D.T., and Sheng, M. (2008). Critical role of CDK5 and Polo-like kinase 2 in homeostatic synaptic plasticity during elevated activity. *Neuron* *58*, 571–583.
- Stanton, P.K., Winterer, J., Zhang, X.L., and Müller, W. (2005). Imaging LTP of presynaptic release of FM1-43 from the rapidly recycling vesicle pool of Schaffer collateral-CA1 synapses in rat hippocampal slices. *Eur. J. Neurosci.* *22*, 2451–2461.
- Su, S.C., Seo, J., Pan, J.Q., Samuels, B.A., Rudenko, A., Ericsson, M., Neve, R.L., Yue, D.T., and Tsai, L.H. (2012). Regulation of N-type voltage-gated calcium channels and presynaptic function by cyclin-dependent kinase 5. *Neuron* *75*, 675–687.
- Takahashi, T., and Momiyama, A. (1993). Different types of calcium channels mediate central synaptic transmission. *Nature* *366*, 156–158.
- Thalhammer, A., Contestabile, A., Ermolyuk, Y.S., Ng, T., Volynski, K.E., Soong, T.W., Goda, Y., and Cingolani, L.A. (2017). Alternative splicing of P/Q-type Ca(2+) channels shapes presynaptic plasticity. *Cell Rep.* *20*, 333–343.
- Thanawala, M.S., and Regehr, W.G. (2013). Presynaptic calcium influx controls neurotransmitter release in part by regulating the effective size of the readily releasable pool. *J. Neurosci.* *33*, 4625–4633.
- Tokuoka, H., and Goda, Y. (2008). Activity-dependent coordination of presynaptic release probability and postsynaptic GluR2 abundance at single synapses. *Proc. Natl. Acad. Sci. USA* *105*, 14656–14661.
- Turrigiano, G. (2012). Homeostatic synaptic plasticity: local and global mechanisms for stabilizing neuronal function. *Cold Spring Harb. Perspect. Biol.* *4*, a005736.
- Turrigiano, G.G., Leslie, K.R., Desai, N.S., Rutherford, L.C., and Nelson, S.B. (1998). Activity-dependent scaling of quantal amplitude in neocortical neurons. *Nature* *391*, 892–896.
- Tyson, J.R., and Snutch, T.P. (2013). Molecular nature of voltage-gated calcium channels: structure and species comparison. *WIREs Membrane Transport and Signaling* *2*, 181–206.
- Wheeler, D.B., Randall, A., and Tsien, R.W. (1994). Roles of N-type and Q-type Ca<sup>2+</sup> channels in supporting hippocampal synaptic transmission. *Science* *264*, 107–111.
- Wierenga, C.J., Ibata, K., and Turrigiano, G.G. (2005). Postsynaptic expression of homeostatic plasticity at neocortical synapses. *J. Neurosci.* *25*, 2895–2905.
- Wierenga, C.J., Walsh, M.F., and Turrigiano, G.G. (2006). Temporal regulation of the expression locus of homeostatic plasticity. *J. Neurophysiol.* *96*, 2127–2133.
- Wondolowski, J., and Dickman, D. (2013). Emerging links between homeostatic synaptic plasticity and neurological disease. *Front. Cell. Neurosci.* *7*, 223.
- Wu, L.G., and Saggau, P. (1994). Presynaptic calcium is increased during normal synaptic transmission and paired-pulse facilitation, but not in long-term potentiation in area CA1 of hippocampus. *J. Neurosci.* *14*, 645–654.
- Zhao, C., Dreosti, E., and Lagnado, L. (2011). Homeostatic synaptic plasticity through changes in presynaptic calcium influx. *J. Neurosci.* *31*, 7492–7496.
- Zhu, Y., Xu, J., and Heinemann, S.F. (2009). Two pathways of synaptic vesicle retrieval revealed by single-vesicle imaging. *Neuron* *61*, 397–411.

**Cell Reports, Volume 21**

**Supplemental Information**

**Homeostatic Presynaptic Plasticity**

**Is Specifically Regulated by P/Q-type Ca<sup>2+</sup>**

**Channels at Mammalian Hippocampal Synapses**

**Alexander F. Jeans, Fran C. van Heusden, Bashayer Al-Mubarak, Zahid Padamsey, and Nigel J. Emptage**

## Supplemental figures

S1a

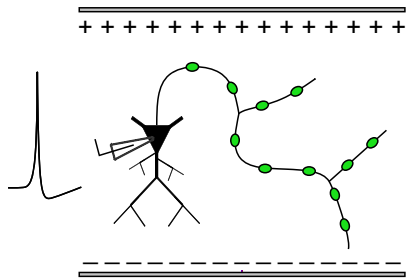

c

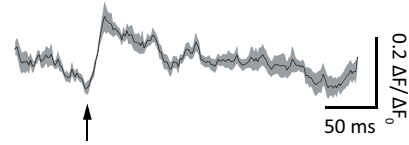

b

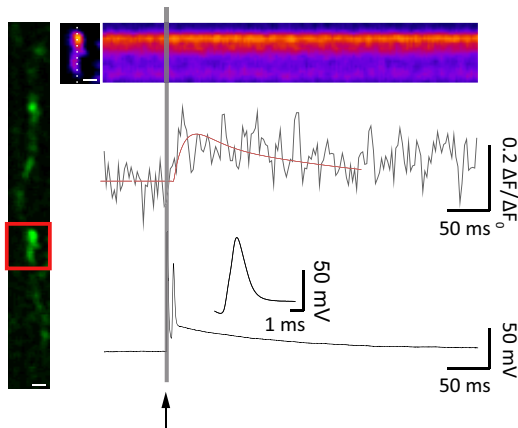

d

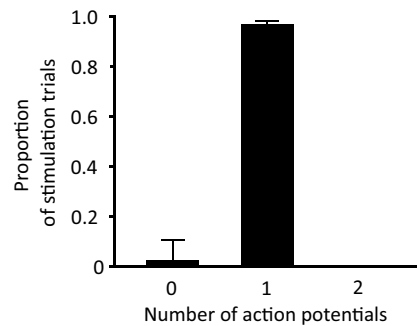

**Figure S1.** Field stimulation evokes single action potentials to drive detectable presynaptic  $\text{Ca}^{2+}$  influx. Related to Figure 1. (a) Experimental configuration: dissociated hippocampal neurons expressing SyGCaMP5 were patched, and both electrophysiology and bouton  $\text{Ca}^{2+}$  fluorescence were monitored during low frequency (0.2 Hz) field stimulation. (b) Representative experiment. Left: SyGCaMP5 expressing boutons from a recorded neuron (image scale bar = 1  $\mu\text{m}$ ). Confocal laser scanning was restricted to a line across a single bouton (red box) to enable fast resolution imaging (500 Hz). Right: Sample line scan and quantified raw fluorescent changes are shown, along with time-locked electrophysiological recordings. The arrow and grey vertical line denote the time at which a single field stimulus was delivered. The stimulus evoked a single action potential, which is shown on two time scales, and a corresponding fluorescent increase in the bouton. An exponential function (red trace) has been fitted to the raw fluorescent trace to aid visualization. (c) Average field stimulation-evoked bouton  $\text{Ca}^{2+}$  transient, from 19 imaged boutons across 6 recorded cells. Shaded region represents  $\pm$  s.e.m. (d) Quantification of action potential number evoked by single field stimuli (140 trials across 6 recorded cells). The vast majority of field stimuli (97%) resulted in single action potentials. Error bars represent  $\pm$  s.e.m.



S2

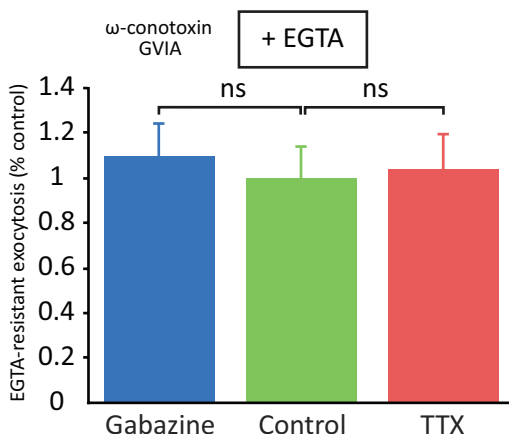

**Figure S2.** HSP does not elicit changes in the physical coupling of VGCC and release sites. Related to Figure 4. SypH 2x-expressing neurons were loaded with the cell-permeable  $\text{Ca}^{2+}$  chelator EGTA-AM (200 $\mu\text{m}$  for 60s), then stimulated with 100AP at low frequency in the presence of folimycin and  $\omega$ -conotoxin GVIA to isolate P/Q-type VGCC. We used incubation conditions for EGTA which led to a reduction of the response to 68.6%  $\pm$  0.017 (n = 185 synapses from 5 neurons) of its initial value under control conditions. Because of its relatively slow  $\text{Ca}^{2+}$  binding rate, EGTA is expected to preferentially affect the release of vesicles that are located further from sites of  $\text{Ca}^{2+}$  influx (Parekh, 2008); therefore, if homeostatic changes in release are associated with alterations in coupling of vesicles to VGCC, this should be reflected by changes in the sensitivity of release to EGTA. However, we found that neither gabazine nor TTX treatment changed the EGTA sensitivity of release compared to untreated controls, indicating that changes in the physical proximity of releasable vesicles and VGCC do not contribute to homeostatic regulation of release. Graph shows resistance to EGTA treatment expressed as % of control (-EGTA) response: gabazine-treated, 1.095  $\pm$  0.144 (n = 191 synapses from 5 neurons), vehicle-treated control, 1  $\pm$  0.137 (n = 185 synapses from 5 neurons); TTX-treated, 1.040  $\pm$  0.156 (n = 112 synapses from 5 neurons). Error bars represent  $\pm$  s.e.m. ns = non-significant.

## Supplemental experimental procedures

### Neuronal cultures and transfection

Hippocampal neurons from postnatal day 1 (P1) Wistar rats were seeded onto poly-D-lysine-coated coverslips and cultured in Neurobasal medium supplemented with 2% fetal calf serum (FCS), 2% B27, 1% Glutamax and 1% penicillin/streptomycin. The day after plating, half the medium was changed for Neurobasal supplemented with 2% B27 and 1% Glutamax only; this medium was used for all further feeds. Cells were transfected at 8 days *in vitro* (DIV) with either SypH 2x (gift of Dr. Y. Zhu) or SyGCamp5 (gift of Professor L. Lagnado) plasmids using Lipofectamine 2000 (Invitrogen). To induce chronic alterations in network activity, TTX (500nM) or gabazine (10 $\mu\text{M}$ ) was added to the culture medium 24-36 hours before imaging.

### Live cell imaging

Experiments were performed on dissociated hippocampal cultures at DIV 14-18 when synapses are mature. Before imaging, coverslips were washed in Tyrode's solution (120mM NaCl, 2.5mM KCl, 20mM HEPES, 30mM glucose, 2mM  $\text{CaCl}_2$ , 2 mM  $\text{MgCl}_2$ , pH. 7.4) for 20 minutes to remove drug treatments. Coverslips were then mounted in a Chamlyde EC-B18 stimulation chamber (Live Cell Instrument) on the stage of an Olympus IX-71 inverted microscope fitted with a 100X, NA 1.40 UPlanSApo objective and an Andor iXon EM CCD camera. Fluorescence illumination was supplied by a 100W mercury lamp used with appropriate neutral density filters and shuttered (Uniblitz CS25, Vincent Associates) during all non-data acquisition periods. Suitable fields were selected using the relatively good resting fluorescence signal exhibited by both pHLuorin and GCaMP probes, the only criterion being that the boutons show normal, healthy morphology. APs were evoked by passing 20V, 1ms current pulses from a custom-made stimulation box via platinum electrodes. pHLuorin imaging was carried out at 1Hz;  $\text{Ca}^{2+}$  imaging was carried out at 10Hz. Stimulation, image acquisition and shuttering were all under the co-

ordinated control of WinWCP software (Strathclyde Electrophysiology Software). Experiments were carried out at room temperature in Tyrode's buffer. 10 $\mu$ M NBQX and 50 $\mu$ M APV were added to block recurrent activity. NH<sub>4</sub>Cl applications were done with 50mM NH<sub>4</sub>Cl in substitution of 50mM of NaCl. For SypH 2x experiments, folimycin (10nM) was diluted into the medium. For experiments in which VGCCs were blocked, cultured hippocampal neurons were incubated with the P/Q-type channel blocker  $\omega$ -agatoxin IVA (400nM) or  $\omega$ -conotoxin GVIA (400nM) for at least 3 min. prior to imaging.

### Combined patch clamping and live cell imaging

To confirm that our stimulation protocol reliably elicits single AP, and that these drive presynaptic Ca<sup>2+</sup> influx which generates a detectable SyGCaMP5 signal, we recorded from dissociated neuronal cultures expressing SyGCaMP5 whilst simultaneously imaging presynaptic Ca<sup>2+</sup> responses. These recordings were carried out in whole-cell patch using patch electrodes (4-8M $\Omega$ ) filled with internal solution (in mM: 135 KGlucuronate, 10 KCl, 10 HEPES, 2 MgCl<sub>2</sub>, 2 Na<sub>2</sub>ATP and 0.4 Na<sub>3</sub>GTP). Electrophysiological data was acquired with an Axoclamp 2A amplifier (Axon Instruments), recorded with WinWCP (Strathclyde Electrophysiology Software) and analysed with Clampfit (Axon Instruments) and Excel (Microsoft). Data was acquired at 3 kHz and sampled at 10 kHz. Images were acquired using a BioRad MRC-1000 confocal laser scanning system, equipped with a 488nm argon line, and LaserSharp software. Images were acquired through a 60x water-immersion objective (Olympus; 0.9 NA). Line scans were taken at 500Hz. Fluorescent changes were quantified as  $\Delta F/F = (F - F_{\text{baseline}}) / F_{\text{baseline}} - F_{\text{background}}$  using ImageJ and Excel.

### Optical fluctuation analysis

Optical fluctuation analysis allows the source of trial-to-trial variation in Ca<sup>2+</sup> responses to be identified (Sabatini and Svoboda, 2000). For each bouton, the coefficient of variation (CV = standard deviation/mean) of the peak amplitude of response over 5 trials was calculated. CV is related to the number of functional VGCC in each bouton, N, and their probability of opening in response to an AP, p, as given by:  $CV^2 = (pN)/(1 - p)$ . We calculated the mean CV<sup>2</sup> across boutons for each of the three treatment conditions and plotted this against mean peak response. We then derived curves showing changes in CV<sup>2</sup> predicted if homeostatic changes in Ca<sup>2+</sup> response amplitude were explained solely by changes in N, p or q, the free Ca<sup>2+</sup> concentration per channel opening. The estimate of p required for these predictions was taken from previous work (Ermolyuk et al., 2013). Curve fitting was carried out using linear regression and a t-test with correction for multiple comparisons was used to assess whether the experimental data differed significantly from that predicted by N, p or q changes.

### Statistical analysis

Statistical analysis was performed using GraphPad Prism and MATLAB. Unless otherwise stated, the two-tailed unpaired Student's t-test was used to determine the statistical significance of observed differences between various conditions. Where other tests were used, this is clearly stated in the caption of the appropriate figure. P values greater than 0.05 were regarded as non-significant. Quantal analysis of pHluorin signals (Figure 1e) was performed in MATLAB by fitting a sum of multiple Gaussian distributions to the quantal frequency distribution. For this analysis, negative values of  $\Delta F_{1AP} / \Delta F_{NH4Cl}$  and values >0.04 were excluded. The Gaussian mixture distribution model with the lowest AIC value was taken as the best fit.

## References

- Ermolyuk, Y.S., Alder, F.G., Surges, R., Pavlov, I.Y., Timofeeva, Y., Kullmann, D.M., and Volynski, K.E. (2013). Differential triggering of spontaneous glutamate release by P/Q-, N- and R-type Ca<sup>2+</sup> channels. *Nature Neuroscience* 16, 1754-1763.
- Sabatini, B.L., and Svoboda, K. (2000). Analysis of calcium channels in single spines using optical fluctuation analysis. *Nature* 408, 589-593.
